# Supplementary material for: Thermo- and water-induced shape memory poly(vinyl alcohol) supramolecular networks crosslinked by self-complementary quadruple hydrogen bonding
Source: Royal Society of Chemistry journal article supplement (doi:10.1039/c6py01302c), 2016-01-01
Supplement: c6py01302c1.pdf [file c6py01302c1.pdf]

## SUPPORTING INFORMATION

for

# Thermo- and Water-Induced Shape Memory Poly(vinyl alcohol) Supramolecular Network Crosslinked by Self-Complementary Quadruple Hydrogen Bonding

Hongmei Chen,<sup>ab</sup> Ying Li,<sup>a</sup> Gong Tao,<sup>a</sup> Lin Wang,<sup>a</sup> and Shaobing Zhou<sup>a†</sup>

---

<sup>a</sup>Key Laboratory of Advanced Technologies of Materials, Ministry of Education, School of Materials Science and Engineering, Southwest Jiaotong University, Chengdu, 610031, PR China..

<sup>b</sup>Department of Chemistry and Materials Science, Sichuan Normal University, Chengdu, PR China.

† Corresponding Author: Prof. Shaobing Zhou; Fax: 86-28-87634649; Tel: 86-28-87634068; E-mail: shaobingzhou@swjtu.cn

**The Verification of UPy Dimers.** The UPy groups have the capacity for self-assembly by quadruple hydrogen bonding, which can be associated with a donor-donor-acceptor-acceptor (DDAA) array or a donor-acceptor-donor-acceptor (DADA) array.<sup>1</sup> The DDAA array is present as the keto tautomer of UPy dimers, whereas the DADA array is as the enol tautomer (**Figure 4Sa**).<sup>2</sup> To further prove the formation of UPy dimers in the PVA networks, <sup>1</sup>H NMR and FT-IR spectra were employed to identify the characteristic features of the tautomers. In the <sup>1</sup>H NMR spectrum of UPy-NCO in CDCl<sub>3</sub> (**Figure 4Sb**), the NH proton signals are found at 13.12, 11.88 and 10.20 ppm. These signals are indicative of extensive hydrogen bonding as the 4[1H]-pyrimidinone tautomer.<sup>3</sup> The FT-IR spectrum of the keto form of the UPy dimers

shows a band at  $1699\text{ cm}^{-1}$  that is characteristic of the carbonyl stretch of pyrimidine, which is absent in the enol tautomer.<sup>2</sup> Solid-state  $^1\text{H-NMR}$  was performed on PVA-UPy-10% to determine the properties of the undissolved pure hydrogen-bonded polymer networks. In Figure 4Sc, proton resonances of NH overlap, and only two weak peaks are observed at 12.64 and 7.76 ppm. FT-IR spectroscopy is also sensitive at detecting changes in the hydrogen bonding of the UPy groups.<sup>2</sup> The ATR FT-IR spectra of PVA-UPy-10% is shown in Figure 4S c, and a band similar to the vibration of the UPy functional group can be observed in the keto form of UPy-NCO. For the pyrimidin-4-ol tautomer, there is a band at approximately  $2500\text{ cm}^{-1}$  corresponding to the vibration of a hydrogen-bonded OH group.<sup>4</sup> However, in Figure 2c there is an absence of this vibration, further indicating that the PVA-UPy-10% was present as the keto tautomer. Therefore, the UPy dimmers are formed in PVA-UPy-10% via quadruple hydrogen bonds in DDAA arrays, rather than DADA arrays, which is consistent with a prior report.<sup>5</sup>

#### REFERENCES

- (1) F. H. Beijer, R. P. Sijbesma, H. Kooijman; A. L. Spek and E. W. Meijer, *J. Am. Chem. Soc.* 1998, **120**, 6761.
- (2) M. Hutin, E. Burakowska-Meise, W. P. J.Appel, P. Y. W. Dankers and E. W. Meijer, *Macromolecules*, 2013, **46**, 8528.
- (3) B. J. Folmer, R. Sijbesma, R. Versteegen, J. Van der Rijt and E. W. Meijer, *Adv. Mater.* 2000, **12**, 874.
- (4) H. Kautz, D. J. M. van Beek, R. P. Sijbesma and E. W. Meijer, *Macromolecules*, 2006, **39**, 4265.

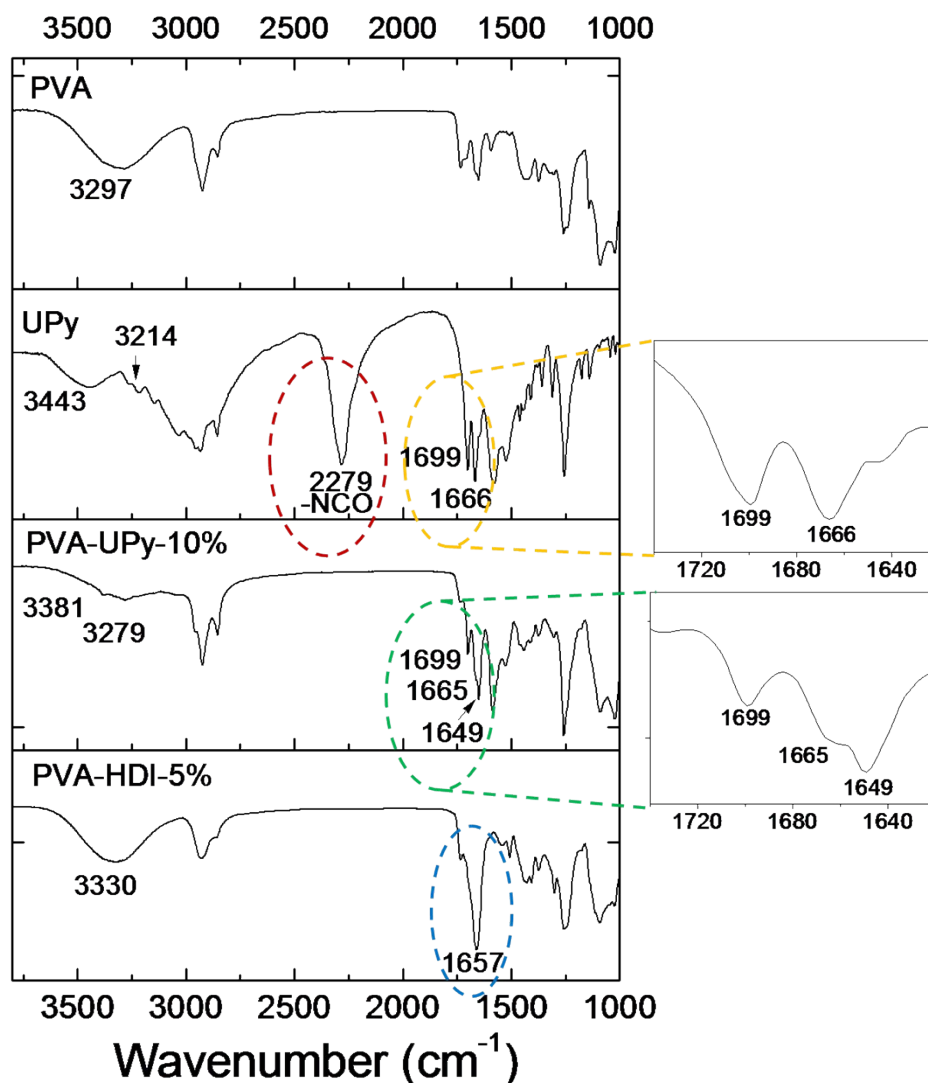

**Figure S1** FT-IR spectra of polymer PVA-UPy- 10% and PVA-HDI-5%. For UPy, the peak at 2279 cm<sup>-1</sup> are corresponding to the isocyanate vibration (NCO), 1699 cm<sup>-1</sup> and 1666 cm<sup>-1</sup> corresponding to the carbonyl vibration (C=O) in pyrimidinone and urea respectively. In PVA-UPy- 10%, isocyanate vibration disappeared and a new peak at 1649 cm<sup>-1</sup> corresponding to the carbonyl vibration (C=O) in urethane appeared, which indicated the UPy successfully attached to PVA. In PVA-HDI-5%, the peak at 1657 cm<sup>-1</sup> corresponding to the carbonyl vibration (C=O) in urethane, also indicate the HDI successfully reacted with PVA.

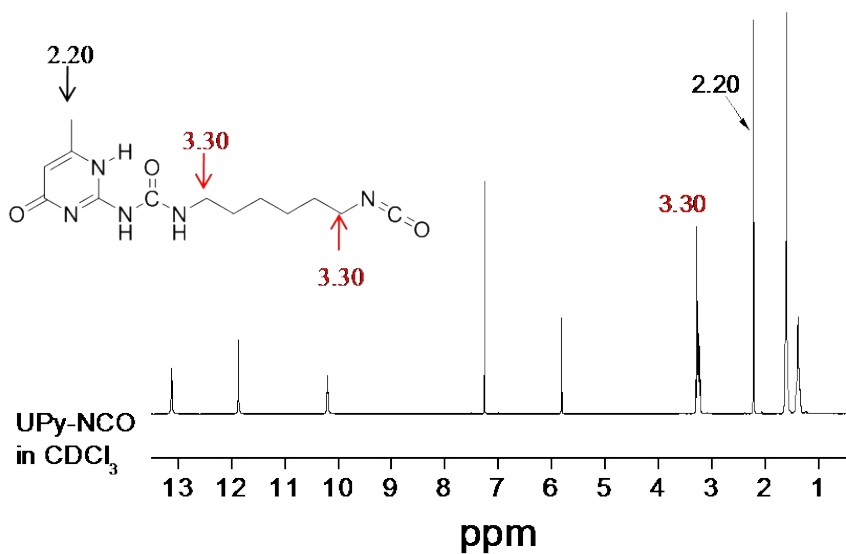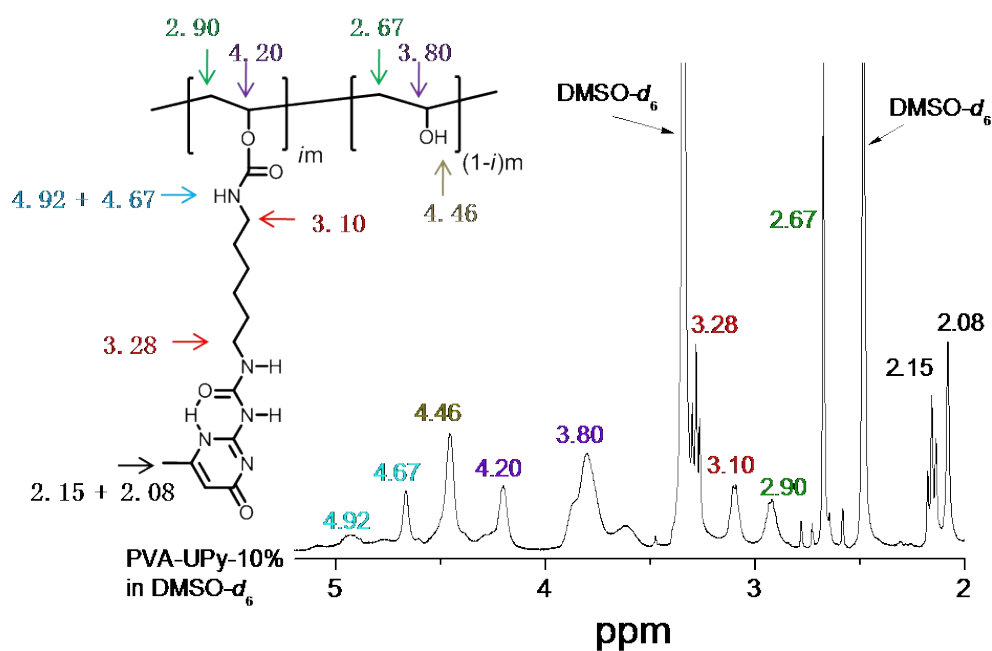

**Figure S2**  $^1\text{H}$  NMR spectra of UPy-NCO and PVA-UPy-10%. In UPy-NCO, the protons adjacent to the isocyanate (NCO) are at 3.30 ppm, while in PVA-UPy-10% that protons shift to 3.10 ppm indicating the formation of urethane. And two new peaks appeared at 4.92 and 4.67 ppm corresponding to the proton of urethane  $[\text{NH}(\text{C}=\text{O})\text{O}]$ . The formation of urethane proved UPy-NCO successfully reacted with the OH of PVA.

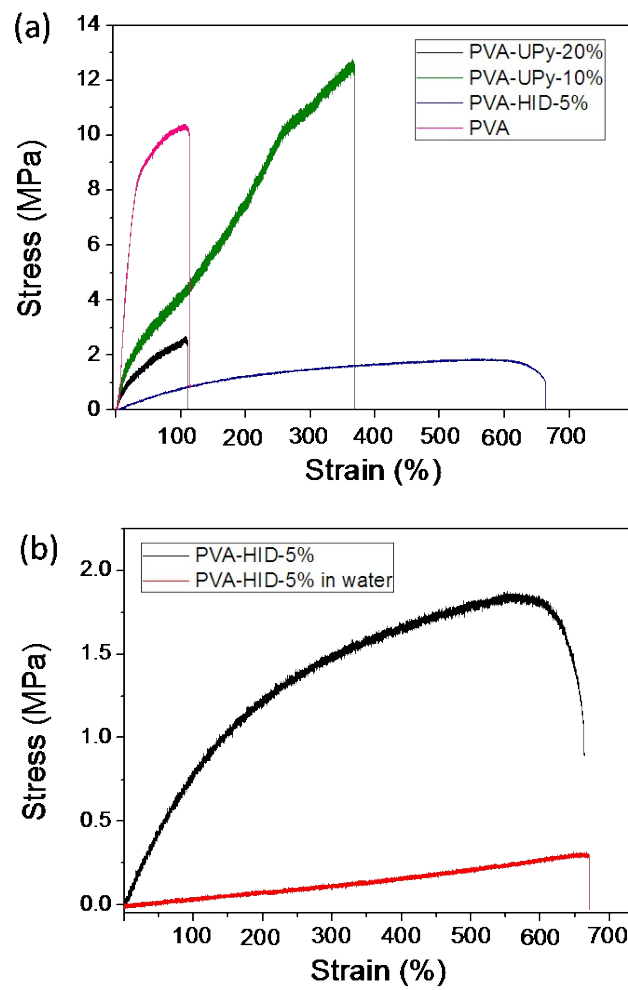

**Figure S3** Tensile curves of (a) PVA crosslinked by HDI and UPy; (b) PVA-HDI-5% before and after absorbing water.

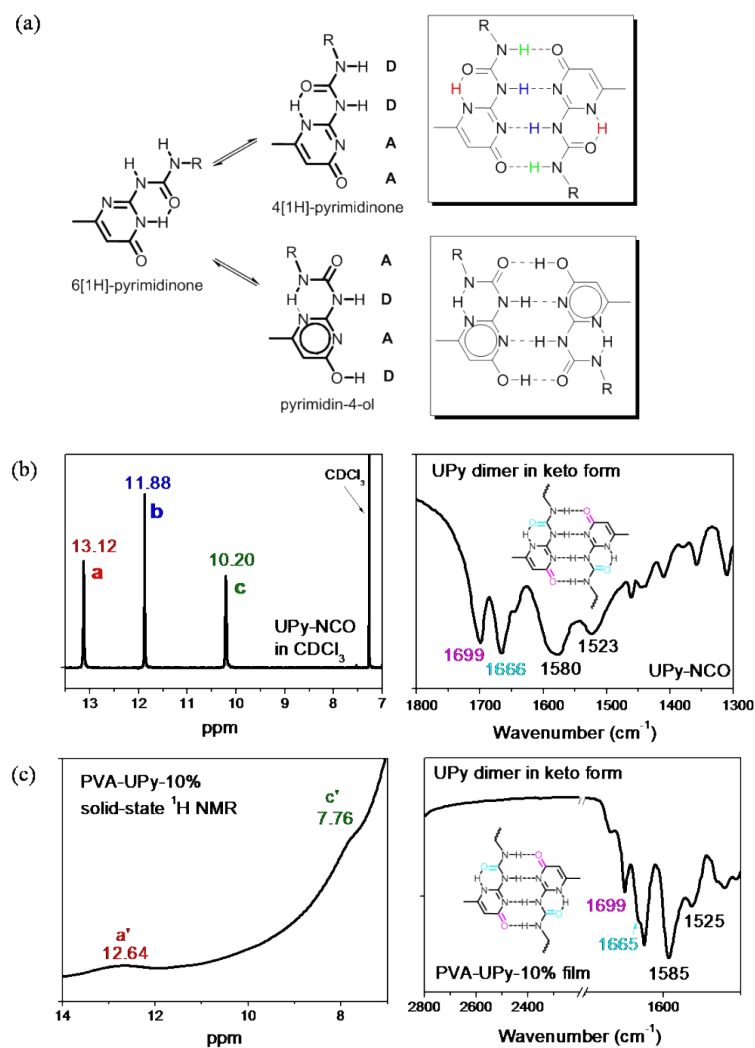

**Figure S4.** (a) Tautomeric forms of UPy groups, where 6[1H]-pyrimidinone can form a DDAA array as the 4[1H]-pyrimidinone tautomer, or it can assume the DADA configuration as the pyrimidin-4-ol tautomer.<sup>2</sup> (b) The  $^1\text{H}$  NMR and FT-IR spectrum of UPy-NCO that indicates the UPy is dimerized as 4[1H]-pyrimidinone. (c)  $^1\text{H}$  NMR of polymer PVA-UPy-10% in solid state and the FT-IR spectra of a PVA-UPy-10% film in dry state (the same as UPy-NCO), indicating that the UPy is also dimerized as 4[1H]-pyrimidinone.

**Table S1** Swelling ratio and gel contents of polymer PVA-HDI-*i* and PVA-UPy-*i* in

NMP

| Sample      | Swelling Ratio ( $S_r$ , %) | Gel Contents ( $G_r$ , %) |
|-------------|-----------------------------|---------------------------|
| PVA-HDI-5%  | 1376±45                     | 95.2±1.3                  |
| PVA-HDI-10% | 950±31                      | 97.6±2.2                  |
| PVA-HDI-20% | 475 ± 17                    | 97.7 ± 3.7                |
| PVA-UPy-5%  | dissolved                   | dissolved                 |
| PVA-UPy-10% | dissolved                   | dissolved                 |
| PVA-UPy-20% | dissolved                   | dissolved                 |

**Table S2** Transition temperature of polymer PVA-HDI-*i* and PVA-UPy-*i* testing by DSC

| Sample      | The second heating | The second cooling |
|-------------|--------------------|--------------------|
|             | $T_g$ (°C)         | $T_g$ (°C)         |
| PVA         | 47.1               | 46.5               |
| PVA-HDI-5%  | 29.4               | 18.8               |
| PVA-HDI-10% | 23.5               | 11.8               |
| PVA-HDI-20% | -0.5               | -10.4              |
| PVA-UPy-5%  | 39.2               | 38.6               |
| PVA-UPy-10% | 48.7               | 48.6               |
| PVA-UPy-20% | 69.3               | 60.5               |

**Table S3** Shape fixing and recovery ratio of polymer PVA-HDI-*i* and PVA-UPy-*i* in hot air.

| Sample      | Shape Fixing Ratio ( $R_f$ , %) | Shape Recovery Ratio ( $R_r$ , %) |
|-------------|---------------------------------|-----------------------------------|
| PVA         | 95                              | 92                                |
| PVA-HDI-5%  | 98                              | 98                                |
| PVA-HDI-10% | 98                              | 97.                               |
| PVA-HDI-20% | no                              | no                                |
| PVA-UPy-5%  | no                              | no                                |
| PVA-UPy-10% | 99                              | 87                                |
| PVA-UPy-20% | 98                              | 89                                |

**Table S4** Shape recovery ratio of polymer PVA-HDI-*i* and PVA-UPy-*i* in water

| Sample      | Shape Recovery Ratio ( $R_r$ , %) |
|-------------|-----------------------------------|
| PVA-HDI-5%  | 96                                |
| PVA-HDI-10% | 97                                |
| PVA-UPy-10% | 98                                |
| PVA-UPy-20% | 98                                |
